# Supplementary material
Source: Springer Nature journal article supplement (https://www.springermedizin.de/resource/supplementary/12885_2009_1900_MOESM3_ESM.pdf/9460054)

## Fractional Unextended Primer vs Input DNA

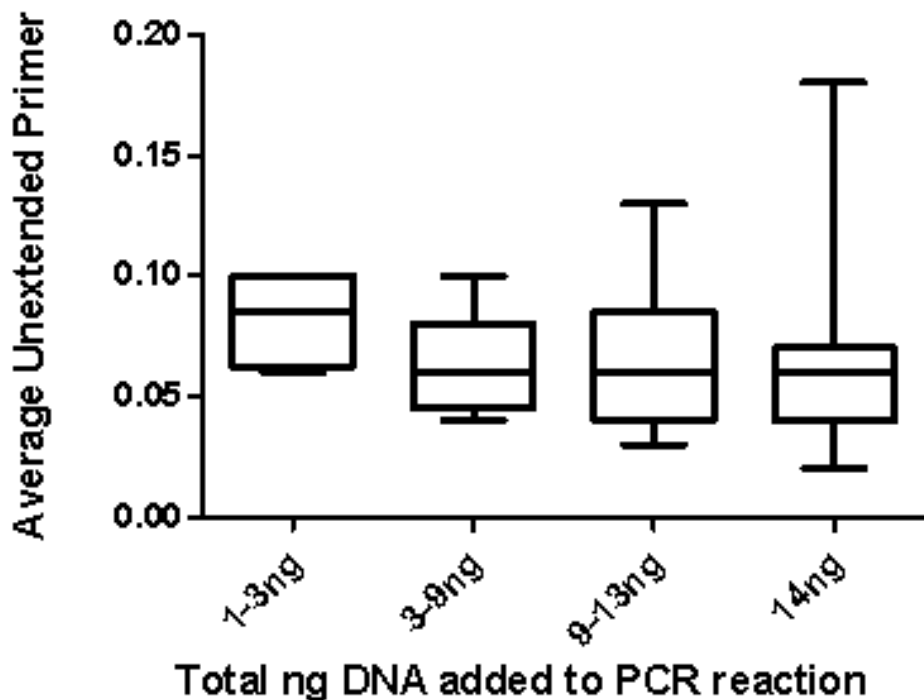

Supplement: MOESM3 [file 9460054]
